# Supplementary material for: A liquid-phase peptide synthesis in cyclohexane-based biphasic thermomorphic systems
Source: Royal Society of Chemistry journal article supplement (doi:10.1039/b205156g), 2002-01-01
Supplement: b205156g.doc [file b205156g.doc]

Supplementary Material (ESI) for Chemical Communications

This journal is © The Royal Society of Chemistry 2002

A Liquid-phase peptide synthesis in cyclohexane-based biphasic thermomorphic systems

Kazuhiro Chiba,*Yusuke Kono, Shokaku Kim, Kohsuke Nishimoto, Yoshikazu Kiatano

and Masahiro Tada

Laboratory of Bio-organic Chemistry, Tokyo University of Agriculture and Technolgy

3-5-8 Saiwai-cho, Fuchu, Tokyo 183-8509, Japan. Fax:+81-42-360-8830; Tel: +81-42-367-5700; E-mail: chiba@cc.tuat.ac.jp

General Procedure for the sequential peptide synthesis

*Preparation of a CH-Soluble-Platform [CHSP]-combined amino acid*

To a solution of Fmoc-Valine (170 mg) in CH2Cl2 (3 ml), 125 mg of DCC (dicyclohexylcarbodiimide) was added. The solution was stirred for 15 min at ambient temperature. After filtration, the filtrate was concd. *in vacuo* to dryness. The residue was then dissolved in 3 ml of DMF/DMA (1:1 v/v), and the solution was combined with the cyclohexane-soluble-platform [CHSP] **1** in CH (50 mg / 3 ml) at room temperature. To the biphasic solution, 6.6 mg of DMAP (4-dimethylaminopyridine) was added, then heated to 35 oC to form a homogenized solution. After standing for 60 min, the solution was cooled to 5 oC to form the biphasic solution (From the upper layer, [CHSP]-Val- Fmoc **2** was isolated in 99 % yield). The upper CH-layer was separated followed by the addition of 10 % diethylamine / DMF / DMA (50:50, 3 ml). The solution was heated to 35 oC, allowed to stand for 60 min, the CH layer was then separated after cooling. From the CH solution, [CHSP]-Val-NH2 **3** was isolated in 95 % yield.

**2;** 1H-NMR (CDCl3) 7.76 (2H, d, J=7.7 Hz), 7.60 (2H, d, J=7.7 Hz), 7.40 (2H, dt, J=2.6, 7.3 Hz), 7.31 (2H, t, J=7.3 Hz), 6.53 (2H, s), 5.31 (1H, d, J=9.2 Hz), 5.11 (1H, d, J=12.1 Hz), 5.05 (1H, d, J=12.1 Hz), 4.38 (2H, m), 4.23 (1H, t, J=7.3 Hz), 3.94 (6H, m), 2.19 (1H, m), 1.78 (4H, m), 1.73(2H, m), 1.45 (6H, m), 1.35-1.23 (84H, br.), 0.95 (3H, d, J=7.0 Hz), 0.88 (12H, m); 13C-NMR (CDCl3) 172.0, 156.2, 153.2, 143.9, 143.8, 141.3, 138.4, 130.2, 128.3, 127.7,127.1, 125.1, 120.0, 107.1, 73.4, 69.2, 67.4, 67.1, 59.0, 47.2, 32.0, 31.4, 30.3, 29.8, 29.7, 29.5, 29.4, 26.1, 22.7, 14.1; TOF-MS(POS) MF calcd for C81H135NO7 [M+Na]+, 1257, found 1257.

**3;** 1H-NMR (400 MHz)  6.54(2H, s), 5.07(1H, d, J=12.1 Hz), 5.03(1H, d, J=12.1 Hz), 3.95(4H, t, J=6.6 Hz), 3.94(2H, t, J=6.6 Hz), 3.33(2H, d, J=5.1 Hz), 2.07-2.01(1H, m), 1.81-1.77(4H, m), 1.76-1.71(2H, m), 1.49-1.43(6H, m), 1.37-1.23(84H, br), 0.96(3H, d, J=7.0 Hz), 0.89-0.86(12H, m); 13C-NMR (150 MHz)  175.4, 153.2, 138.3, 130.7, 107.1, 73.4, 69.2, 66.8, 59.9, 32.2, 32.0, 30.3, 29.8, 29.7, 29.6, 29.4, 26.1, 22.7, 19.3, 17.1, 14.1; TOF-MS(pos) calcd forC66H125NO5 [M+Na]+ 1034, found 1034.

Peptide-chain elongation on the [CHSP]

Fmoc-Gly (57 mg), HOBt (55 mg) and DIPCD (diisopropylcarbodiimide, 25 mg) was dissolved in 2 ml of DMF /DMA (1:1 v/v), and it was allowed to stand for 150 min at room temperature. After cooling to 5 oC, 2 ml of the [CHSC]-Val-NH2 **3** (60 mg) in CH solution was added to form the biphasic solution. The reaction mixture was gradually heated to 35 oC (in 60 min), and was allowed to stand for additional 60 min at 35 oC. The solution was cooled back (5oC) to give [CHSC]-Val-Gly-Fmoc **4** in the separated upper layer in 99 % yield. Fmoc group of **3** in CH (3 ml) was removed by the addition of 10 % diethylamine / DMF / DMA (50:50, 3 ml) in the immixed solution at 35 oC (30 min), followed by the separation of cooled CH-layer in which deprotected product [CHSP]-Val-Gly-NH2 **5** was obtainedin 99 % yield.

**4;** 1H-NMR (400 MHz)  7.77(2H, d, J=7.3 Hz), 7.59(2H, d, J=7.3 Hz), 7.40(2H, t, J= 7.3 Hz), 7.31(2H, dt, J=0.7, 7.3 Hz), 6.52(2H, s), 6.38(1H, d, J=8.4 Hz), 5.44-5.37(1H, br), 5.10(1H, d, J=12.1 Hz), 5.02(1H, d, J=12.1 Hz), 4.62(2H, dd, J=8.4,4.8 Hz), 4.42(2H, d, J=7.0 Hz), 4.24(1H, t, J=7.0 Hz), 3.96-3.92(8H, m), 2.21-2.16(1H, m), 1.81-1.76(4H, m), 1.75-1.70(2H, m), 1.48-1.43(6H, m), 1.37-1.21(84H, br), 0.91(3H, d, J=7.0Hz), 0.88(9H, t, J=7.0 Hz), 0.86(3H, d, J=7.0 Hz); 13C-NMR (150 MHz)  171.5, 168.7, 156.5, 153.1, 143.6, 141.2, 138.3, 130.0, 127.7, 127.0, 125.0, 120.0, 107.0, 73.4, 69.2, 67.5, 67.4, 57.1, 47.1, 32.0, 31.4, 30.4, 29.8, 29.7, 29.5, 29.4, 26.1, 22.8, 19.0, 17.7, 14.2; MALDI TOF-MS(pos) calcd for C83H138N2O8 [M+Na]+ 1314, found 1314.

**5;** 1H-NMR (600MHz) 7.74 (1H d, J=9.2Hz), 6.53(2H, s), 5.11(1H, d, J=12.1Hz), 5.02(1H, d, J=12.1Hz), 4.61(1H, dd, J=9.2, 5.1Hz), 3.95(4H, t, J=6.6Hz), 3.94(2H, t, J=6.6 Hz), 3.39(2H, s), 2.24-2.18(1H, m), 1.81-1.76(4H, m), 1.75-1.71(2H, m), 1.49-1.44(6H, m), 1.37-1.20(84H, br), 0.93(3H, d, J=7.0 Hz), 0.90-0.86(12H, m); 13C-NMR (150 MHz)  172.6, 171.8, 153.1, 130.3, 125.5, 106.9, 73.4, 69.2, 67.2, 56.6, 44.8, 32.0, 31.3, 30.4, 30.3, 29.8, 29.7, 29.5, 29.4, 26.2, 22.8, 19.1, 17.8, 14.2; MALDI TOF-MS(pos) calcd for C68H128N2O6 [M+Na]+ 1091, found 1091.

Fmoc-Phe (63 mg), HOBt (63 mg) and DIPCD (25 mg) was dissolved in 2 ml of DMF, and it was allowed to stand for 150 min at room temperature. After cooling to 5 oC, 2 ml of the [SP]-Val-Gly-NH2 (60 mg) in CH solution was added to form the biphasic solution. The reaction mixture was gradually heated to 35 oC (in 60 min), and allowed to stand for additional 60 min at 35 oC. The solution was cooled back (5 oC) to give [CHSP]-Val-Gly-Phe-Fmoc **6** in the separated upper layer in 99 % yield. Fmoc group of **6** in CH (3 ml) was removed by the addition of 10 % diethylamine / DMF / DMA (50:50, 3 ml) in the immixed solution at 35 oC (30 min), followed by the separation of cooled CH-layer in which deprotected product [CHSP]-Val-Gly-Phe-NH2 **7** was obtained in 99 % yield.

**6;** 1H-NMR (600MHz) 7.75(2H, d, J=7.7Hz), 7.53-7.49(2H, m), 7.39(2H, dd, J=7.3, 2.2 Hz), 7.30-7.27(4H, m), 7.25-7.21(1H, m), 7.20-7.15(2H, br), 6.76-6.69(1H, br), 6.60-6.55(1H, br), 6.50(2H, s), 5.40-5.34(1H, br), 5.07(1H, d, J=12.1 Hz), 4.99(1H, d, J=12.1 Hz), 4.56(1H, dd, J=8.8, 4.8 Hz), 4.46-4.30(2H, m), 4.17(1H, t, J=7.0 Hz), 4.10-4.03(1H, m), 3.92(6H, t, J=6.6 Hz), 3.83-3.76(2H, m), 3.18-3.11(1H, m), 3.10-3.02(1H, m), 2.20-2.13(1H, m), 1.79-1.69(6H, m), 1.48-1.41(6H, m), 1.35-1.23(84H, br.m), 0.91-0.85(15H, m); 13C-NMR(150 MHz) 171.5, 171.3, 168.3, 156.0, 153.1, 143.6, 141.2, 138.2, 136.2, 130.1,129.1, 128.8, 127.7, 127.1, 127.0, 125.0, 124.9, 120.0, 107.0, 73.4, 69.2, 67.5, 67.1, 57.3, 47.2, 32.0, 31.3, 30.4, 29.8, 29.7, 29.5, 29.4, 26.2, 22.8, 19.0, 17.8, 14.2; MALDI TOF-MS(pos) calcd for C92H147N3O9 [M+Na]+ 1461, found 1461.

**7;** 1H-NMR (400 MHz) 7.99-7.93(1H, m), 7.35-7.30(2H, m), 7.27-7.21(3H, m), 6.66(1H, d, J=8.8 Hz), 6.52(2H, s), 5.11(1H, d, J=12.1 Hz), 5.02(1H, d, J=12.1 Hz), 4.58(1H, dd, J=8.8, 4.8 Hz), 4.05(1H, d, J=5.9 Hz, minor), 4.01(1H, d, J=5.9 Hz, major), 3.98-3.91(7H, m), 3.66(1H, d, J=10.0 Hz), 3.32(1H, dd, J=13.6, 3.9Hz), 2.67(1H, dd, J=13.6, 10.0 Hz), 2.24-2.15(1H, m), 1.82-1.69(6H, m), 1.50-1.39(6H, m), 1.37-1.21(84H, br), 0.92(3H, d, J=6.8 Hz), 0.90-0.85(12H, m); 13C-NMR 150 MHz) 175.2, 171.5, 168.9, 153.1, 151.4, 137.7, 129.2, 128.8, 126.9, 125.5, 107.0, 73.5, 69.2, 67.5, 57.2, 56.5, 43.4, 40.9, 32.0, 31.3, 30.4, 29.8, 29.7, 29.5, 29.4, 26.2, 22.8, 19.1, 17.7, 14.2; MALDI TOF-MS(pos) calcd for C77H137N3O7 [M+Na]+ 1239, found 1239.
